# Supplementary material for: Hierarchical Linkage between the Basic Characteristics of Smallholders and Technology Awareness Determines Small-Holders’ Willingness to Adopt Green Production Technology
Source: MDPI journal article supplement (doi:10.3390/agriculture12081275), 2022-08-21
Supplement: s1 [file s1]

**Table S1.** Surveyed provinces and acreage of wheat, maize, and rice[1]

| Region         | cultivation area(10 <sup>3</sup> ha) |         |         |
|----------------|--------------------------------------|---------|---------|
|                | Wheat                                | Maize   | Rice    |
| Beijing        | 8.39                                 | 35.65   | 0.2     |
| Hebei          | 2216.92                              | 3417.1  | 78.72   |
| Shanxi         | 535.88                               | 1742.22 | 2.45    |
| Inner Mongolia | 478.96                               | 3823.9  | 160.86  |
| Jilin          | 4.76                                 | 4287.24 | 837.14  |
| Heilongjiang   | 48.74                                | 5480.67 | 3872.03 |
| Shanghai       | 7.51                                 | 1.24    | 104.06  |
| Anhui          | 2825.2                               | 1234.76 | 2512.08 |
| Jiangxi        | 14.4                                 | 47.6    | 3441.83 |
| Shandong       | 3934.43                              | 3871.09 | 112.48  |
| Henan          | 5673.67                              | 3818.01 | 617.07  |
| Guangxi        | 3.86                                 | 596.97  | 1760.11 |
| Chongqing      | 18.52                                | 440.93  | 657.27  |
| Sichuan        | 596.82                               | 1839.36 | 1866.32 |
| Yunnan         | 320                                  | 1802.46 | 818.93  |
| Shaanxi        | 964.19                               | 1179.44 | 105.09  |

**Table S2.** Green production technology list

| Green production technologies       | Green production technologies                                  |                                                                              |                                                                |
|-------------------------------------|----------------------------------------------------------------|------------------------------------------------------------------------------|----------------------------------------------------------------|
|                                     | Wheat                                                          | Maize                                                                        | Rice                                                           |
| Scientific fertilization technology | Soil testing and formulated fertilization technology           | Soil testing and formulated fertilization technology                         | Soil testing and formulated fertilization technology           |
|                                     | Nitrogen fertilizer backward technology                        | Micro-fertilizer application technology<br>Stepwise fertilization technology |                                                                |
| Water-saving irrigation technology  | Frozen water irrigation technology                             | Irrigation technique                                                         | Irrigation technique                                           |
| Biological control technology       | One spray three prevention                                     | Chemical control technology                                                  | Control technology of caterpillar fungus disease               |
|                                     | Spring grass and autumn treatment                              | Chemical fertilizer, and pesticide identification technologies               | Chemical fertilizer, and pesticide identification technologies |
|                                     | Chemical fertilizer, and pesticide identification technologies |                                                                              |                                                                |
| Conservation tillage technology     | Deep tilling and deep loosening technology                     | Deep tilling and deep loosening technology                                   | Timely land preparation technology                             |
|                                     | Straw returning technology                                     |                                                                              | Straw returning technology                                     |
|                                     | Organic fertilizer application technology                      |                                                                              | Organic fertilizer application technology                      |

**Table S3.** Variable name and expected direction

| Variable name                      | Variable definition                                                                                                             |
|------------------------------------|---------------------------------------------------------------------------------------------------------------------------------|
| Cognition of production technology | 1=Yes, 0=No                                                                                                                     |
| Technology benefits expected       | quantity                                                                                                                        |
| Gender                             | 1=Not at all, 2=Not very well, 3= General, 4=More well, 5=Very well                                                             |
| Age                                | 1=Not at all, 2=Not very well, 3= General, 4=More well, 5=Very well                                                             |
| Education level                    | 1=willing to adopt, 2=unwilling to adopt                                                                                        |
| Experience of planting             | 1=willing to adopt, 2=unwilling to adopt                                                                                        |
| Number of family members           | 1=willing to adopt, 2=unwilling to adopt                                                                                        |
| Geomorphic type                    | 1=willing to adopt, 2=unwilling to adopt                                                                                        |
| Soil barrier factor                | 1=Male, 0=Female                                                                                                                |
| Number of farmland                 | years                                                                                                                           |
| Types of business entities         | 1=Elementary school and below, 2=Junior high school/ junior high school, 3=High school, 4=College, 5=Bachelor's degree or above |
| Proportion of planting income      | years                                                                                                                           |
| Ln(cultivated area)                | persons                                                                                                                         |
| Planting-breeding type             | 1=Flat land, 0=Mountainous or sloping land or depression                                                                        |
| Cognition of production technology | 1=Yes; 0=No                                                                                                                     |
| Technology benefits expected       | quantity                                                                                                                        |
| Gender                             | 1=Yes; 0=No                                                                                                                     |
| Age                                | quantity                                                                                                                        |
| Education level                    | mu                                                                                                                              |
| Experience of planting             | 1=Yes; 0=No                                                                                                                     |

**Table S4.** Results of model fitting of factors influencing green production technologies.

| Indicator                          | Scientific fertilization technology |                 | Water-saving irrigation technology |                   | Biological control technology |                 | Conservation tillage technology |                 |
|------------------------------------|-------------------------------------|-----------------|------------------------------------|-------------------|-------------------------------|-----------------|---------------------------------|-----------------|
|                                    | Coefficient                         | Odds ratio      | Coefficient                        | Odds ratio        | Coefficient                   | Odds ratio      | Coefficient                     | Odds ratio      |
| Cognition of production technology | 0.180(0.092)**                      | 1.197(0.110)**  | 4.114(0.961)***                    | 61.161(58.777)*** | 0.898(0.374)**                | 2.456(0.918)**  | 0.000(0.129)                    | 1.000(0.129)    |
| Technology benefits expected       | 0.089(0.268)                        | 1.093(0.293)    | 2.643(0.958)***                    | 14.055(13.467)*** | 0.970(0.525)*                 | 2.639(1.385)*   | 1.474(0.387)***                 | 4.365(1.689)*** |
| Gender                             | -0.260(0.198)                       | 0.771(0.153)    | 0.258(0.422)                       | 1.295(0.547)      | 0.037(0.221)                  | 1.037(0.229)    | 0.029(0.286)                    | 1.030(0.295)    |
| Age                                | -0.014(0.012)                       | 0.986(0.011)    | -0.002(0.024)                      | 0.998(0.024)      | -0.014(0.013)                 | 0.986(0.013)    | -0.001(0.017)                   | 0.999(0.017)    |
| Education level                    | -0.388(0.122)***                    | 0.679(0.083)*** | 0.425(0.232)*                      | 1.529(0.354)*     | -0.316(0.133)**               | 0.729(0.097)**  | 0.056(0.154)                    | 1.057(0.163)    |
| Experience of planting             | 0.004(0.009)                        | 1.004(0.009)    | -0.010(0.020)                      | 0.990(0.020)      | 0.020(0.010)**                | 1.021(0.011)**  | 0.007(0.014)                    | 1.007(0.014)    |
| Number of family members           | -0.157(0.054)***                    | 0.854(0.046)*** | -0.213(0.124)*                     | 0.808(0.100)*     | -0.081(0.058)                 | 0.922(0.054)    | 0.248(0.076)***                 | 1.281(0.098)*** |
| Geomorphic type                    | 0.435(0.288)                        | 1.545(0.445)    | 0.489(0.636)                       | 1.630(1.038)      | 0.132(0.336)                  | 1.142(0.384)    | 0.165(0.399)                    | 1.180(0.471)    |
| Soil barrier factor                | 0.578(0.399)                        | 1.783(0.711)    | 1.209(0.64)*                       | 3.349(2.144)*     | 0.422(0.443)                  | 1.526(0.676)    | 0.589(0.516)                    | 1.802(0.929)    |
| Number of farmland                 | -0.015(0.015)                       | 0.985(0.015)    | -0.010(0.027)                      | 0.990(0.027)      | -0.068(0.020)***              | 0.934(0.019)*** | -0.087(0.029)***                | 0.917(0.027)*** |
| Types of business entities         | 0.168(0.314)                        | 1.183(0.372)    | -0.667(0.614)                      | 0.513(0.315)      | -0.400(0.374)                 | 0.670(0.251)    | 0.352(0.404)                    | 1.423(0.575)    |
| Proportion of planting income      | 0.789(0.264)*                       | 2.202(0.582)*** | 0.761(0.554)***                    | 2.140(1.185)      | 0.032(0.284)***               | 1.033(0.293)    | 0.175(0.387)***                 | 1.191(0.461)    |
| Ln(cultivated area)                | -0.196(0.202)                       | 0.822(0.166)    | 0.259(0.347)                       | 1.296(0.45)       | 0.655(0.231)***               | 1.926(0.445)*** | 0.71(0.273)***                  | 2.034(0.556)*** |
| Planting-breeding type             | 0.226(0.267)                        | 1.254(0.334)    | -0.311(0.571)                      | 0.732(0.418)      | -0.021(0.313)                 | 0.979(0.307)    | 0.414(0.374)                    | 1.514(0.566)    |
| Crop varieties                     | Controlled                          |                 |                                    |                   |                               |                 |                                 |                 |
| Constant term                      | -1.467(0.851)*                      | 0.231(0.196)*   | -6.734(1.813)***                   | 0.001(0.002)***   | -3.387(1.001)***              | 0.034(0.034)*** | -5.966(1.269)***                | 0.003(0.003)*** |
| LR chi2(17)                        | 167.730                             |                 | 241.460                            |                   | 203.580                       |                 | 114.250                         |                 |
| Prob > chi2                        | 0.000                               |                 | 0.000                              |                   | 0.000                         |                 | 0.000                           |                 |
| Log likelihood                     | -399.472                            |                 | -122.873                           |                   | -342.751                      |                 | -218.399                        |                 |

|                       |       |       |       |       |
|-----------------------|-------|-------|-------|-------|
| Pseudo R <sup>2</sup> | 0.174 | 0.496 | 0.229 | 0.207 |
| Sample size           |       | 709   |       |       |

---

\*Indicates the significance of the coefficients at P <10%, \*\* indicates significance at P <5%, \*\*\* indicates significance at P <1%, and the robust standard errors are in parentheses.

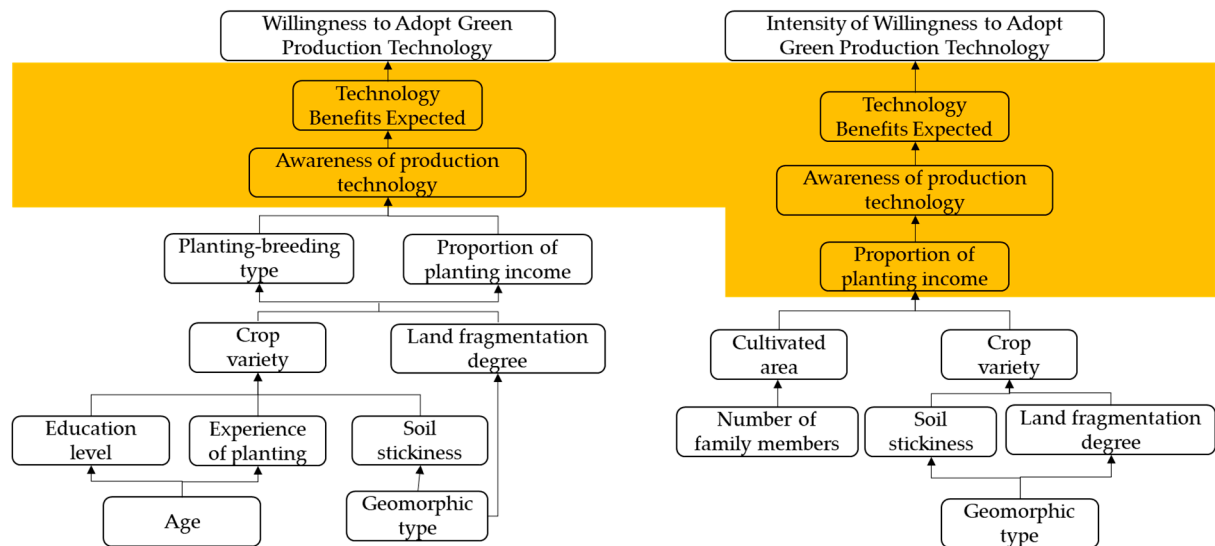

**Figure S1.** Summary of overall regression results

## References

1. National Bureau of Statistics (NBS). Online statistical database. Beijing. 2020. Available online: <http://www.stats.gov.cn/> (accessed on 7 January 2022).
